# Supplementary material for: A Novel Double Mosaic Virus-like Particle-Based Vaccine against SARS-CoV-2 Incorporates Both Receptor Binding Motif (RBM) and Fusion Domain
Source: MDPI journal article supplement (doi:10.3390/vaccines9111287), 2021-11-05
Supplement: s1 [file s1]

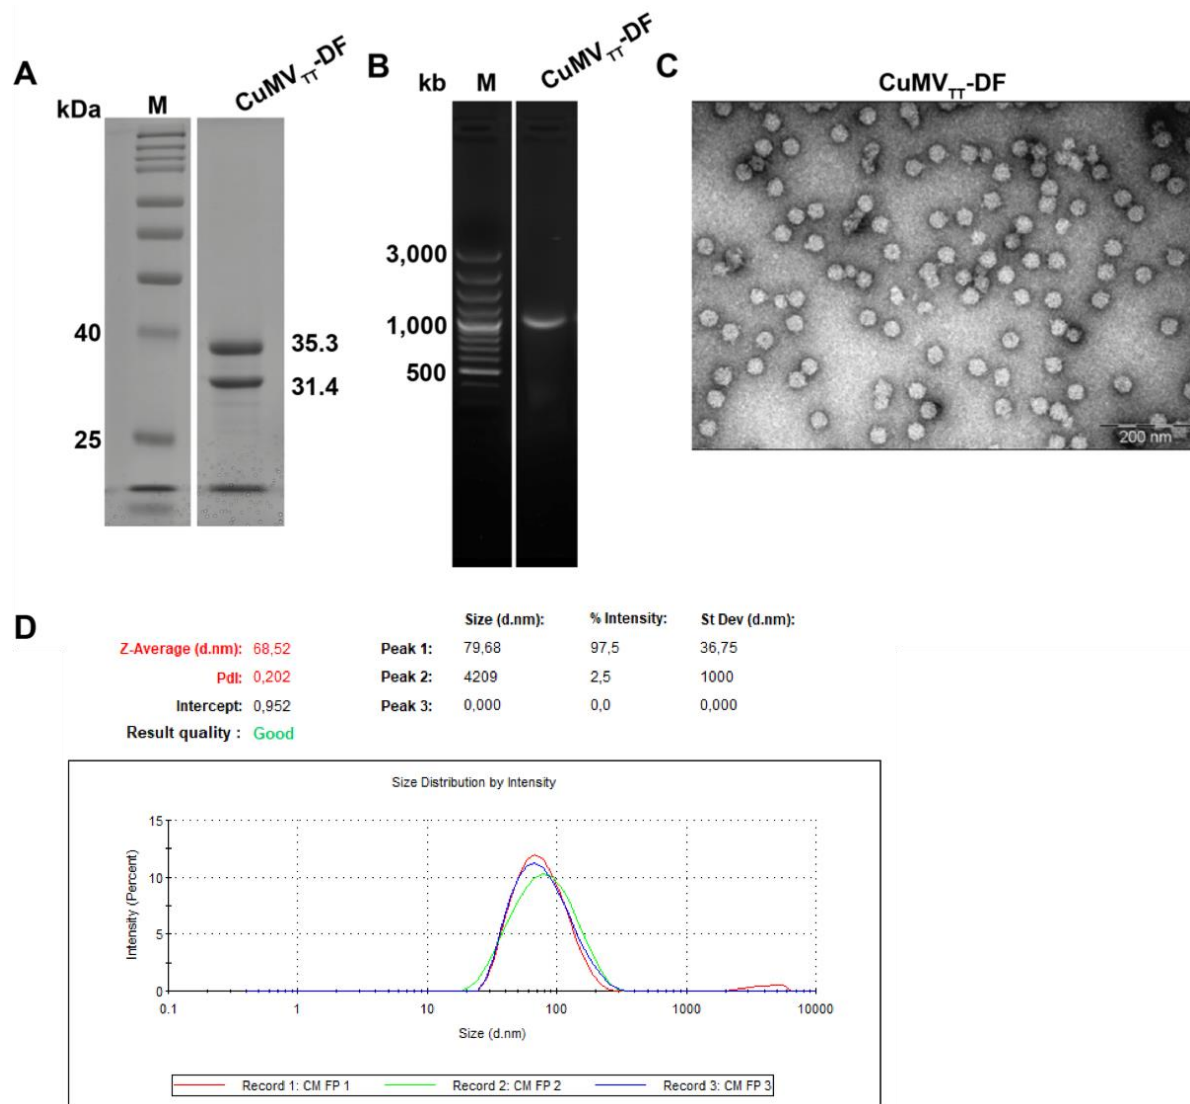

**Figure S1.** SDS-PAGE (A) and agarose (B) gel analysis of CuMV<sub>TT</sub>-DF vaccine after storage at 4 °C for 6 months; TEM (C) and DLS (D) analysis of CuMV<sub>TT</sub>-DF vaccine after storage at 4 °C for 12 months.
